# Supplementary material for: Cancer-Associated Fibroblasts in Pancreatic Ductal Adenocarcinoma Determine Response to SLC7A11 Inhibition
Source: Oxford University Press journal article supplement (doi:10.1158/0008-5472.can-20-2496), 2021-05-12
Supplement: 00085472can202496-sup-248020_3_supp_7068450_qry716.docx [file 00085472can202496-sup-248020_3_supp_7068450_qry716.docx]

| **Antibody** | **Supplier** | **Catalogue Number** | **Dilution** |
| --- | --- | --- | --- |
| α-tubulin | Sigma-Aldrich | T9026 | 1:1000 for Western blot (overnight, 4oC) |
| human SLC7A11 (main antibody) | Cell Signaling Technology | 12691 | 1:1000 for Western blot; 1:25 for immunohistochemistry/immunofluorescence in human PDAC TMAs; 1:100 for immunohistochemistry in orthotopic tumour tissue (overnight, 4oC) |
| human SLC7A11 (validation antibody) | Abcam | ab37185 | 1:1000 for Western blot; 1:2000 for immunohistochemistry (overnight, 4oC) |
| human SLC7A11 (validation antibody) | Novus Biologicals | NB300-318 | 1:1000 for Western blot; 1:2000 for immunohistochemistry (overnight, 4oC) |
| mouse SLC7A11 | Cell Signaling Technology | 98051 | 1:1000 for Western blot (overnight, 4oC) |
| HSP90 | Cell Signaling Technology | 3868S | 1:1000 for Western blot (overnight, 4oC) |
| LC3B (D11) XP® | Cell Signaling Technology | 4875 | 1:1000 for Western blot (overnight, 4oC) |
| anti-rabbit-HRP | DAKO | P0447 | 1:2000 for Western blot (1h, room temperature) |
| anti-mouse-HRP | DAKO | P0448 | 1:2000 for Western blot (1h, room temperature) |
| biotinylated anti-rabbit secondary antibody | Vector Laboratories | BA-1000 | 1:50 for immunohistochemistry in human PDAC TMAs; 1:100 for immunohistochemistry in orthotopic tumour tissue (1h, room temperature) |
| biotinylated anti-rat secondary antibody | Vector laboratories | BA-4000 | 1:100 for immunohistochemistry (1h, room temperature) |
| αSMA | Sigma-Aldrich | A5228 | 1:1000 for immunohistochemistry/immunofluorescence; 1:5000 for immunohistochemistry in orthotopic tumour tissue; 1:25,000 for immunohistochemistry in KPC tumour tissue (overnight, 4oC) |
| CD31 | Taylor Bio-Medical | DIA-310 | 1:50 for immunohistochemistry (overnight, 4oC) |
| anti-rabbit-AF647 | Abcam | ab150115 | 1:1000 for immunofluorescence (1h, room temperature) |
| anti-mouse-AF488 | Life Technologies | A11001 | 1:1000 for immunofluorescence (1h, room temperature) |
| Rat IgG isotype control | Abcam | ab18703 | Used at same concentration as primary antibody (overnight, 4oC) |
| rabbit IgG isotype control | DAKO | X0903 | Used at same concentration as primary antibody (overnight, 4oC) |

**Supplementary Table 1: List of antibodies.**
