# Supplementary material for: Cancer-Associated Fibroblasts in Pancreatic Ductal Adenocarcinoma Determine Response to SLC7A11 Inhibition
Source: Oxford University Press journal article supplement (doi:10.1158/0008-5472.can-20-2496), 2021-05-12
Supplement: 00085472can202496-sup-248020_3_supp_7068451_qry716.docx [file 00085472can202496-sup-248020_3_supp_7068451_qry716.docx]

| **Age at diagnosis** | **Number of patients** |  | **Overall Stage** | **Number of patients** |
| --- | --- | --- | --- | --- |
| ≥50 | 144 |  | IA | 2 |
| <50 | 11 |  | IB | 2 |
| **Gender** |  |  | IIA | 34 |
| Male | 85 |  | IIB | 113 |
| Female | 70 |  | III | 0 |
| **Ethnicity** |  |  | IV | 4 |
| Asian | 12 |  | **TNM Staging** |  |
| Asian, White/Caucasian | 1 |  | T1 | 2 |
| Black/African | 1 |  | T2 | 5 |
| Pacific Islander | 1 |  | T3 | 148 |
| White/Caucasian | 140 |  | N0 | 30 |
| **Smoker** |  |  | N1 | 77 |
| Ever | 81 |  | N1a | 7 |
| Never | 70 |  | N1b | 32 |
| Not reported | 4 |  | NX | 1 |
| **Alcohol consumption** |  |  | M0 | 7 |
| Ever | 88 |  | M1 | 4 |
| Never | 61 |  | MX | 144 |
| Not reported | 6 |  | **Perineural invasion** |  |
| **Margin Status** |  |  | Yes | 131 |
| R0 | 105 |  | No | 23 |
| R1 | 47 |  | Not reported | 1 |
| R2 | 3 |  | **Vascular invasion** |  |
| **Macroscopic tumour location** |  |  | Yes | 95 |
| Ampulla | 2 |  | No | 56 |
| Body | 11 |  | Not reported | 4 |
| Head | 121 |  | **Recurrence at liver** |  |
| Head (Uncinate) | 7 |  | Yes | 54 |
| Tail | 14 |  | No | 63 |
|  |  |  | No recurrence | 38 |

**Supplementary Table 2: Australian Pancreatic Cancer Genome Initiative International Cancer Genome Cohort patient cohort characteristics.** TNM = Tumour, Node, Metastasis.
