# Supplementary material for: Cancer-Associated Fibroblasts in Pancreatic Ductal Adenocarcinoma Determine Response to SLC7A11 Inhibition
Source: Oxford University Press journal article supplement (doi:10.1158/0008-5472.can-20-2496), 2021-05-12
Supplement: 00085472can202496-sup-248020_3_supp_7068453_qry7p6.docx [file 00085472can202496-sup-248020_3_supp_7068453_qry7p6.docx]

| **Univariate Parameter** | **HR** | **95%** | **CI** | **Univariate (Log-Rank) p-value** |
| --- | --- | --- | --- | --- |
| Tumour score | 0.837 | 0.587 | 1.193 | 0.325 |
| Stroma score | 1.34 | 0.946 | 1.899 | 0.099 |
| Gender | 0.788 | 0.555 | 1.119 | 0.182 |
| Age at Diagnosis (years) | 0.851 | 0.425 | 1.705 | 0.649 |
| Smoker | 0.998 | 0.701 | 1.421 | 0.989 |
| Alcohol consumption | 0.93 | 0.646 | 1.338 | 0.695 |
| Margin Status | 1.721 | 1.19 | 2.487 | 0.004 |
| Lymph Nodes Involved | 1.409 | 0.908 | 2.184 | 0.126 |
| Perineural Invasion | 1.214 | 0.739 | 1.997 | 0.444 |
| Vascular Invasion | 1.982 | 1.336 | 2.941 | 0.001 |
| Overall Stage AJCC | 1.66 | 1.064 | 2.59 | 0.026 |
| Macroscopic Tumour Location | 0.885 | 0.458 | 1.709 | 0.716 |
| **Multivariate Parameter** | **HR** | **95%** | **CI** | **Multivariate (Cox Regression) p-value** |
| Stroma score | 1.45 | 1.016 | 2.07 | 0.041 |
| Vascular Invasion | 2.066 | 1.388 | 3.076 | 0.000 |

**Supplementary Table 4: SLC7A11 multivariate survival analysis parameters.** HR = Hazard ratio. CI = Confidence interval. Univariate parameters that were used in our multivariate analysis and their univariate Log-Rank results are shown in the top rows. Multivariate analysis results are shown in the bottom two rows for the most significant parameters.
